# Supplementary material
Source: HighWire-hosted journal article supplement (https://bmjopen.bmj.com/content/14/2/e077309)
Supplement: inline-supplementary-material-2 [file inline-supplementary-material-2.pdf]

**Table 1: Study Characteristics**

| Author Year                  | Country         | Initiative                     | Design                               | Aim                                                                                                                                                                                                                                         | Population and Data Sources                                                                                                                                                                                                                                                                                                                                                                                           | Quality Appraisal |
|------------------------------|-----------------|--------------------------------|--------------------------------------|---------------------------------------------------------------------------------------------------------------------------------------------------------------------------------------------------------------------------------------------|-----------------------------------------------------------------------------------------------------------------------------------------------------------------------------------------------------------------------------------------------------------------------------------------------------------------------------------------------------------------------------------------------------------------------|-------------------|
| Alders & Shut 2022(54)       | The Netherlands | LTCI reform                    | Economic evaluation                  | To discern if municipalities with a low solvency rate (<20 percent) are more likely to engage in strategic cost shifting and if this resulted in an overall upward trend in admission rates to LTC services covered by public LTC services. | People aged 65+ in the Netherlands; data from 327 out of 355 municipalities from 2014–2019.<br><br>Data source(s): Monitor Long-term Care (Monitor Langdurige Zorg); Online dashboard by the Ministry of the Interior; Statistics Netherlands                                                                                                                                                                         | Medium            |
| Beauregard & Miller 2021(47) | U.S.            | Community First Choice program | Comparative case study (qualitative) | To understand state processes related to the adoption of the Medicaid Community First Choice (CFC) Program and to identify factors that influenced states' decisions to adopt CFC.                                                          | LTC population: Medicaid-eligible older adults in Texas, Oklahoma, Maryland, and nationally (U.S.).<br><br>Study population: Data collected from n=46 individuals in roles as follows: federal and state bureaucrats, consumer and provider advocacy groups, consultants, and policy experts. Maryland (n=14), Texas (n=14), Oklahoma (n=9), and national (n=9) level participants.<br><br>Data source(s): Interviews | Medium            |
| Chen et al. 2020(35)         | China           | LTCI pilots                    | Cross-sectional study                | To evaluate the influence of health insurance and other factors on the availability of LTC services.                                                                                                                                        | n=7787; Urban: n=3945; Rural: n=3842; CHARLS (2015) database adults aged 45 and up; the sample is aged 60 and up; CHARLS (2015) covered more than 10,000 families and 17,500 individuals from 150 districts of 28 provinces.<br><br>Data source(s): China Health and Retirement Longitudinal Study (CHARLS) database, 2015                                                                                            | Medium            |
| Chen & Fu 2020(53)           | Taiwan          | LTC 2.0 reform                 | Policy analysis                      | To review the development of LTC policies, present strategies for expanding LTC, and outline policy suggestions and implications.                                                                                                           | Older adults in Taiwan. The proportion of the population aged 65 years and over in Taiwan has doubled from 7% in 1993 to 14% in 2018. The number of older adults receiving LTC services increased from 9,148 in 2008 to                                                                                                                                                                                               | High              |

| Author Year          | Country | Initiative     | Design                                                          | Aim                                                                                                                                                                                                                                        | Population and Data Sources                                                                                                                                                                                                                                                                                                                                                         | Quality Appraisal |
|----------------------|---------|----------------|-----------------------------------------------------------------|--------------------------------------------------------------------------------------------------------------------------------------------------------------------------------------------------------------------------------------------|-------------------------------------------------------------------------------------------------------------------------------------------------------------------------------------------------------------------------------------------------------------------------------------------------------------------------------------------------------------------------------------|-------------------|
|                      |         |                |                                                                 |                                                                                                                                                                                                                                            | 258,351 in 2019, which only accounts for 41.47% of the population needing LTC.<br><br>Data source(s): Policy documents; government data                                                                                                                                                                                                                                             |                   |
| Chen & Ning 2022(43) | China   | LTCI pilot     | Quasi-experimental design                                       | To examine the policy treatment effect of long-term care insurance (LTCI) on health care utilization and OOP health expenditure (OOP) in China.                                                                                            | N=20,814<br>Participants in the China Health and Retirement Longitudinal Study (CHARLS).<br><br>Data source(s): China Health and Retirement Longitudinal Study (CHARLS) longitudinal study, 2018                                                                                                                                                                                    | High              |
| Chiu et al. 2019(52) | Taiwan  | LTC 2.0 reform | Qualitative research                                            | To examine the experiences and challenges of integration for LTC plan 2.0 agencies in Taiwan                                                                                                                                               | LTC population: Older adults in 20 counties where LTC Plan 2.0 was being piloted in Taiwan in early 2017.<br><br>Study population: Interviews with 6 people working in 3 LTC Plan 2.0 Tier A agencies in north, west, and central Taiwan, including a chief executive officer (CEO) or executive director (ED) and a case manager at each agency.<br><br>Data source(s): Interviews | Medium            |
| Dai et al. 2022(41)  | China   | LTCI pilot     | Systematic literature review of LTC policies and implementation | This study examines the LTCI pilot in China and compares it to other LTCI programs in Germany, Japan, and South Korea through a systematic literature review and discusses the implications of its implementation in a national framework. | Adults in one of the 49 expanded pilot cities in China.<br><br>Data source(s): National and local government websites; China National Knowledge Infrastructure, Baidu Scholar and international databases                                                                                                                                                                           | High              |
| Feng et al. 2021(40) | China   | LTCI pilot     | Policy analysis                                                 | To provide a timely review and assessment of China's ongoing LTCI programs                                                                                                                                                                 | People over 60 who meet the eligibility requirement for the LTCI pilot and who live in one of the 15 pilot cities.                                                                                                                                                                                                                                                                  | High              |

| Author Year                       | Country                                           | Initiative                               | Design                 | Aim                                                                                                                                                                                                                    | Population and Data Sources                                                                                                                                                                                                                                                                                      | Quality Appraisal |
|-----------------------------------|---------------------------------------------------|------------------------------------------|------------------------|------------------------------------------------------------------------------------------------------------------------------------------------------------------------------------------------------------------------|------------------------------------------------------------------------------------------------------------------------------------------------------------------------------------------------------------------------------------------------------------------------------------------------------------------|-------------------|
|                                   |                                                   |                                          |                        | across the initial 15 pilot cities. The focus is on synthesizing key LTCI program features across all pilot sites, not on profiling and analyzing individual pilots in depth.                                          | Data source(s): Policy documents; published research articles; grey literature; LTCI Policy Database, School of Public Health, Peking University                                                                                                                                                                 |                   |
| Fong & Borowski 2022(51)          | Singapore                                         | CareShield Life                          | Policy analysis        | To analyze the 2019 long-term care social insurance program, including successes and challenges, goals, design, features, financing arrangements, and initial assessment.                                              | Older adults in Singapore. The proportion of those aged 65 and older increased x3 from 4.9% in 1980 to 14.5% in 2019.<br><br>Data source(s): Not reported. The reference list includes government documents and websites.                                                                                        | High              |
| Han & Shen 2022(42)               | China                                             | LTCI pilot                               | Qualitative research   | To explore the common problems in policy practices and to provide recommendations for further expansion of the LTCI pilot.                                                                                             | LTC population: China's adult population $\geq 60$ , which accounts for 18.7% of the total population.<br><br>Study population: n=10 participants, including managers (n=4), caregivers (n=2), a medical staff member (n=1), and older adults with disabilities (n=3)<br><br>Data source(s): In-depth interviews | High              |
| Hashiguchi & Llana-Nozal 2020(32) | 25 out of 41 OECD countries and EU Member States* | Public social protection systems for LTC | Comparative case study | To provide a novel set of comprehensive and internationally comparable estimates of the adequacy, equity and efficiency of public social protection systems for LTC in old age in OECD countries and EU Member States. | People 65 and older in the selected 25 OECD countries and EU Member States*.<br><br>Data source(s): Survey of Health, Ageing and Retirement in Europe (SHARE) Wave 7                                                                                                                                             | N/A               |

| Author Year                | Country                                              | Initiative                                     | Design                    | Aim                                                                                                                                                                           | Population and Data Sources                                                                                                                                                                                                                                                                                                                                                                                                                                                                                       | Quality Appraisal |
|----------------------------|------------------------------------------------------|------------------------------------------------|---------------------------|-------------------------------------------------------------------------------------------------------------------------------------------------------------------------------|-------------------------------------------------------------------------------------------------------------------------------------------------------------------------------------------------------------------------------------------------------------------------------------------------------------------------------------------------------------------------------------------------------------------------------------------------------------------------------------------------------------------|-------------------|
| Kotschy & Bloom 2022(33)   | Germany, Israel, Japan, the Netherlands, South Korea | LTC systems comparison                         | Policy analysis           | To investigate the challenges that population aging poses to long-term care.                                                                                                  | Adults aged 65+ in Germany, Israel, Japan, the Netherlands, and South Korea<br><br>Data source(s): Survey of Health, Ageing and Retirement in Europe (SHARE) wave 7 and 8; Health and Retirement Study (HRS) wave 13; English Longitudinal Study of Ageing (ELSA) wave 8                                                                                                                                                                                                                                          | N/A               |
| Koumoutzis et al. 2021(49) | U.S.                                                 | Local initiatives to fund social care services | Qualitative research      | To examine how communities across the nation are utilizing local funding streams to support aging services.                                                                   | LTC population: Adults 60+ in the U.S.<br><br>Study population: NR<br><br>Data source(s): 2019 Advancing States national survey of State Units on Aging; telephone calls (State Units on Aging, Area Agencies on Aging, secretary of state's offices, county clerk's offices, and other officials involved in local funding efforts); web searches                                                                                                                                                                | Medium            |
| Koumoutzis et al. 2022(48) | U.S.                                                 | Community LTC initiatives to support ageing    | Survey                    | To study community initiatives developed to provide services to older adults through locally generated tax revenues and provide insight into their caregiver support efforts. | LTC population: Older adults in the U.S.<br><br>Study population: Representatives from 228 organizations across 15 states, delivering LTC services.<br><br>Data source(s): Phase 1: 2019 Advancing States national survey of state units on aging; telephone calls (telephone calls to state units on aging, area agencies on aging, aging services providers, county auditor offices, and Secretary of State offices); online reviews and web searches. Phase 2: Qualtrics survey to local funding organizations | High              |
| Lei et al. 2022(34)        | China                                                | LTCI pilot                                     | Quasi-experimental design | To evaluate the impact of LTCI on the covered populations in the LTCI pilots across different cities from 2015 to 2017, and to study                                          | Older adults (aged 65+) from 152 cities: n=3,423<br>Treatment group (coverage): n=187<br>Control group (no coverage): n=3,236.                                                                                                                                                                                                                                                                                                                                                                                    | High              |

| Author Year          | Country                                                   | Initiative                                                 | Design                    | Aim                                                                                                                                                                                          | Population and Data Sources                                                                                                                                                                                                                                                                                                             | Quality Appraisal |
|----------------------|-----------------------------------------------------------|------------------------------------------------------------|---------------------------|----------------------------------------------------------------------------------------------------------------------------------------------------------------------------------------------|-----------------------------------------------------------------------------------------------------------------------------------------------------------------------------------------------------------------------------------------------------------------------------------------------------------------------------------------|-------------------|
|                      |                                                           |                                                            |                           | various outcomes (including older adults' ADL-related need for care, family burden, medical expenditures, and some important health outcomes) among covered older adults and their families. | Data source(s): Chinese Longitudinal Healthy Longevity Survey (CLHLS)                                                                                                                                                                                                                                                                   |                   |
| Liu & Hu 2022(46)    | China                                                     | LTCl pilot                                                 | Quasi-experimental design | To investigate the impact of the policy pilot on the income fairness of the group system and to comprehensively analyze the institutional effect of the LTCl policy pilot.                   | People aged 60 and over living in one of the 15 LTCl pilot areas (n=25,063) included in CHARLS.<br><br>Data source(s): China Health and Retirement Longitudinal Study (CHARLS) database, 2013, 2015, 2018 (valid samples with a 3-year period)                                                                                          | High              |
| Noda et al. 2021(55) | Japan, Korea, Thailand, China, Indonesia, the Philippines | Healthcare service delivery reform policies for the ageing | Policy comparison         | To compare healthcare service delivery reform policies for older adults in Japan, Korea, Thailand, China, Indonesia and the Philippines.                                                     | LTC population: Older adults in Japan, Korea, Thailand, China, Indonesia, and the Philippines.<br><br>Study population: Health officials of provincial health and welfare departments, and service providers such as doctors and LTC providers (no n provided).<br><br>Data source(s): Document reviews; interviews with key informants | Medium            |
| Peng et al. 2022(44) | China                                                     | LTCl pilot                                                 | Policy analysis           | To assess the sustainability of the LTCl system in China using a policy population economics (PPE) system.                                                                                   | Population of 14 pilot cities in China. Due to a lack of data, one pilot city, Shihezi, was excluded.<br><br>Data source(s): Policy documents; China Statistical Yearbook 2020; the China City Statistical Yearbook; the Chinese National Economy and Social Development Statistics Bulletin                                            | N/A               |

| Author Year          | Country   | Initiative                                           | Design                              | Aim                                                                                                                                                                                                               | Population and Data Sources                                                                                                                                                                                                                                                                                          | Quality Appraisal |
|----------------------|-----------|------------------------------------------------------|-------------------------------------|-------------------------------------------------------------------------------------------------------------------------------------------------------------------------------------------------------------------|----------------------------------------------------------------------------------------------------------------------------------------------------------------------------------------------------------------------------------------------------------------------------------------------------------------------|-------------------|
| Sum et al. 2022(50)  | Singapore | Integrated Patient-Centred Medical Home (PCMH) model | Quasi-experimental design           | To address gaps in the literature on the evaluation of costs associated with the implementation of an integrated PCMH model for community-dwelling older adults with complex needs.                               | Patients with high biopsychosocial health risk, aged $\geq 40$ , who resided in Whampoa (n=165)<br><br>Data source(s): Client Service Receipt Inventory (CSRI) survey                                                                                                                                                | High              |
| Tang et al. 2022(45) | China     | LTCI pilot                                           | Quasi-experimental design           | To evaluate the implementation effect of the Long-Term Care Insurance (LTCI) policy, and its impact on the medical expenses and the health status of the middle-aged and elder population.                        | Families with people middle-aged ( $\geq 45$ ) and older in any of the 12 cities included in the CHARLS database (n=42,591)<br><br>Data source(s): China Health and Retirement Longitudinal Study (CHARLS)                                                                                                           | Medium            |
| Wu et al. 2020(39)   | China     | LTCI pilot                                           | Retrospective cross-sectional study | To evaluate the LTCI pilot by exploring the characteristics and care needs of claimants, and performance of the assessment tool.                                                                                  | Claimants: n=4810; Individuals who received benefits: n=4582;<br>Aged $\geq 60$ years: n=4357;<br>Beneficiaries without dementia: n=3791;<br>Beneficiaries with dementia: n=791;<br>Unsuccessful claimants without dementia: n=206;<br>Unsuccessful claimants with dementia: n=22<br><br>Data source(s): Claims data | Medium            |
| Zhang & Yu 2019(37)  | China     | LTCI pilot                                           | Quasi-experimental design           | To explore the outcomes and evaluate the performance of the LTCI policy in the Chinese pilot cities and estimate the willingness of Chinese citizens to expand the formal implementation of LTCI policy in China. | Older adults engaged in the implementation process of the LTCI pilots in 15 pilot cities (n=1,167)<br>Elite politicians (n=5)<br><br>Data source(s): Survey questionnaire; interviews                                                                                                                                | Medium            |

| Author Year           | Country | Initiative | Design                                       | Aim                                                                                                                                                    | Population and Data Sources                                                                                                                                                                                                                                                    | Quality Appraisal |
|-----------------------|---------|------------|----------------------------------------------|--------------------------------------------------------------------------------------------------------------------------------------------------------|--------------------------------------------------------------------------------------------------------------------------------------------------------------------------------------------------------------------------------------------------------------------------------|-------------------|
| Zhang et al. 2020(36) | China   | LTCI pilot | Quasi-experimental design                    | To examine how the use of formal care impacts the use of informal care in Shanghai, which was one of China's first long-term insurance pilots in 2016. | Families in Shanghai that include an older adult (≥60) who had used formal care provided by LTCI for 1 to 3 months and a child who is primarily responsible for daily informal care. Care recipients: n=407<br>Caregivers n=407<br><br>Data source(s): Interview-based surveys | Medium            |
| Zhou & Dai 2021(38)   | China   | LTCI pilot | Systematic literature review of LTC policies | To review and assess the performance and effectiveness of the LTCI policy regime in China.                                                             | Older adults in one of the 15 pilot cities.<br><br>Data source(s): Policy documents                                                                                                                                                                                            | Medium            |

\*The countries and subnational areas covered include Austria (Vienna region), Belgium (Flanders), Canada (Ontario), Croatia, Czech Republic, England, Estonia (Tallinn), Finland, France, Germany, Hungary, Iceland (Reykjavik), Ireland, Italy (South Tyrol), Japan, Korea, Latvia, Lithuania, Luxembourg, Slovak Republic, Slovenia, Spain, Sweden, the Netherlands, the United States of America (Illinois and California).

Quality appraisal (score % as per # of tool items): high quality=80-100%; medium quality=50-79%; low quality= <50%

Table 2: PROGRESS-Plus characteristics reported by study

| Author               | P | G/S | E | SE | SC | D | A | Author               | P | G/S | E | SE | SC | D | A |
|----------------------|---|-----|---|----|----|---|---|----------------------|---|-----|---|----|----|---|---|
| Alders 2022 (52)     | ✓ |     |   | ✓  |    | ✓ | ✓ | Koumoutzis 2021 (47) |   |     |   |    |    |   |   |
| Beauregard 2021 (45) |   |     |   |    |    |   |   | Koumoutzis 2022 (46) |   |     |   |    |    |   |   |
| Chen 2020 (33)       | ✓ | ✓   | ✓ | ✓  | ✓  | ✓ | ✓ | Lei 2022 (32)        | ✓ | ✓   |   | ✓  | ✓  |   | ✓ |
| Chen 2020 (51)       | ✓ |     |   |    |    |   | ✓ | Liu 2022 (44)        | ✓ | ✓   | ✓ | ✓  | ✓  | ✓ | ✓ |
| Chen 2022 (41)       | ✓ | ✓   | ✓ | ✓  | ✓  | ✓ | ✓ | Noda 2021 (53)       |   |     |   |    |    |   |   |
| Chiu 2019 (50)       |   |     |   |    |    |   |   | Peng 2022 (42)       | ✓ |     |   |    |    | ✓ | ✓ |
| Dai 2022 (39)        | ✓ |     |   |    |    |   | ✓ | Sum 2022 (48)        | ✓ | ✓   | ✓ |    | ✓  | ✓ | ✓ |
| Feng 2021 (38)       | ✓ |     |   |    |    |   | ✓ | Tang 2022 (43)       |   | ✓   | ✓ | ✓  | ✓  | ✓ | ✓ |
| Fong 2022 (49)       |   |     |   |    |    | ✓ | ✓ | Wu 2020 (37)         | ✓ | ✓   |   |    |    | ✓ | ✓ |
| Han 2022 (40)        | ✓ | ✓   |   |    |    | ✓ | ✓ | Zhang 2019 (35)      | ✓ | ✓   |   | ✓  | ✓  | ✓ | ✓ |
| Hashiguchi 2020 (30) | ✓ |     |   | ✓  |    |   | ✓ | Zhang 2020 (34)      | ✓ | ✓   | ✓ | ✓  | ✓  |   | ✓ |
| Kotschy 2022 (54)    | ✓ |     |   |    |    | ✓ |   | Zhou 2021 (36)       |   |     |   |    |    |   |   |

P=Place of residence; G=Gender/Sex; E=Education; SE=Socio-economic status; SC=Social capital; D=Disability; A=Age



## Search Strategies

Search strategies are available via searchRxiv for the following information sources:

- MEDLINE: <https://doi.org/10.1079/searchRxiv.2023.00214>
- CINAHL: <https://doi.org/10.1079/searchRxiv.2023.00213>
- EconLit: <https://doi.org/10.1079/searchRxiv.2023.00216>
- Embase: <https://doi.org/10.1079/searchRxiv.2023.00217>
- ProQuest Dissertations and Theses: <https://doi.org/10.1079/searchRxiv.2023.00220>
- WHO ICTRP: <https://doi.org/10.1079/searchRxiv.2023.00219>
- ClinicalTrials.gov: <https://doi.org/10.1079/searchRxiv.2023.00218>

## *CADTH Grey Matters*

All websites included in the Health Economics category of CADTH Grey Matters were searched or browsed for relevant records:

- Centre for Health Economics and Policy Analysis (McMaster University)
- Centre for Reviews and Dissemination (University of York)
- Economic Burden of Illness in Canada (Public Health Agency of Canada)
- Health Economics Research Unit (University of Aberdeen)
- IDEAS/RePEc database
- IHE publications (Institute of Health Economics, Canada)
- National Quality Measures Clearinghouse (Agency for Healthcare Research and Quality, U.S.)
- OHE publications (Office of Health Economics, United Kingdom)
- Ontario Case Costing Initiative (Ontario Ministry of Health and Long-Term Care)
- THETA Publications and Knowledge Translation to Policy (KT) Activities (Toronto Health Economics and Technology Assessment Collaborative)

If the website had a search feature, the search was as follows: ("long-term care" OR "long term care")

If there were too many results, it was narrowed by adding the following: AND (financing OR funding)

Results: 34 (38 minus 4 duplicates)

## Data extraction form

### General information

#### Study ID

*Enter the Covidence record number here.*

*Example: #34*

#### Title

*Title of paper/abstract/report*

### Last name of lead author

### Characteristics of study

#### **Publication type**

*If publication type is “other” please specify the details below.*

- ☐ Journal article
- ☐ Dissertation/thesis
- ☐ Report
- ☐ Other Click or tap here to enter text.

#### **Aim/purpose/objective of study**

*Enter the research question or hypothesis.*

#### **Study design**

*Studies might not always explicitly state the design, in which case select the best option based on the methods section. If unclear, please include any relevant information in the notes section below.*

- ☐ Randomized controlled trial
- ☐ Non-randomized experimental study
- ☐ Quasi-experimental design

- ☐ Cohort study
- ☐ Cross-sectional study
- ☐ Case-control study
- ☐ Case series
- ☐ Case report
- ☐ Economic evaluation
- ☐ Comparative case study
- ☐ Policy analysis
- ☐ Qualitative research (specific approach)
- ☐ Other Click or tap here to enter text.

**Country/setting**  
*If the study is comparing countries/settings, ensure all the countries are listed, separated by semicolons. If the study does not mention the country but mentions a region, enter the region.*

**Population description**  
*Describe the overall population. For more than one population start a new paragraph.*

**Gender**  
*Enter the breakdown of population gender if reported.*

**Sexual orientation**  
*Enter the breakdown of population sexuality if reported.*

**Race**  
*Enter the breakdown of population racial composition if reported.*

**Age**  
*Enter the overall age of population if reported. If age is reported as a range (e.g. 35–50 years) enter the relevant range and accompanying value with a colon in between (e.g. 60–79: 50%). If there are multiple ranges, separate using a semicolon (e.g. 60–79: 50%; 80–99: 50%).*

**Place of residence**

Enter the breakdown of places of residence (e.g. rural, urban, suburban, long-term care [LTC] congregate setting, etc.) if reported.

Occupation

Enter the breakdown of occupations if reported.

Religious backgrounds

Enter the breakdown of religious backgrounds if reported.

Education

Enter the breakdown of educational backgrounds if reported.

Socioeconomic status

Enter the breakdown of socioeconomic status if reported.

Social capital

Social capital refers to social relationships, networks and social support. Enter information related to the social capital of the population if reported.

Disability

Enter the breakdown of the population disability categories if reported.

LTC financing

LTC system description

Describe the overall LTC system. For more than one system start a new paragraph.

Financing description

Describe how the LTC system is financed. For more than one system start a new paragraph.

Funding mechanism

Enter the details of the funding mechanism(s) in the relevant column. Enter NA in boxes where the funding mechanism is not applicable. Include the percentage mix for each funding mechanism if reported. If not reported, enter NR.

| Funding mechanism | Details | Percentage mix |
|-------------------|---------|----------------|
| Guarantees        |         |                |
| Insurance         |         |                |

|                              |  |  |
|------------------------------|--|--|
| Fees for service             |  |  |
| Loans                        |  |  |
| Repayable contributions      |  |  |
| Result-based financing       |  |  |
| Equity                       |  |  |
| Bonds                        |  |  |
| Charitable donations         |  |  |
| Local government subsidies   |  |  |
| Taxes                        |  |  |
| Co-payment by users          |  |  |
| Central government subsidies |  |  |
| Other                        |  |  |

**Service description**  
*Describe the services covered under the programme policy reform or initiative if reported.*

**Coverage**  
*How does the initiative/programme/policy/reform address LTC coverage? Enter NA if not addressed.*

**Quality**  
*How does the initiative/programme/policy/reform address LTC quality? Enter NA if not addressed.*

**Financial protection**  
*How does the initiative/programme/policy/reform address LTC financial protection? Enter NA if not addressed.*

**Financial sustainability**  
*How does the initiative/program/policy/reform address LTC financial sustainability? Enter NA if not addressed.*

**Empirical evaluation**  
**Intervention**  
*What is the initiative/programme/policy/reform?*

**Comparator**

*What is the initiative/programme/policy/reform being compared to? If there is no comparator enter NA.*

**Intervention time frame**

*What is the time frame of the intervention?*

*Examples: policy put in place in June of 2017; pilot project from January 2017 to August 2019.*

**Data sources**

*Enter the sources of data. If there are multiple sources separate them with a semi-colon.*

**Dates of data collection**

*Enter the start and end date of data collection in yyyy/mm format. If data sources are distinct years enter all years of data collection separated by commas.*

*Examples: 2017/11–2018/03; 2014; 2019; 2021.*

**Key findings and/or outcomes**

*Enter the key findings related to LTC financing.*

**Author's overall conclusion**

*Enter the authors' conclusions as it relates to LTC financing.*

**Reviewer notes**

*Enter any relevant notes or comments that are not captured elsewhere.*
